# Supplementary material
Source: PubMed Central journal article supplement (PMC4924927)
Supplement: NIHMS681939-supplement-Electronic_Copyright_Form_for_Virginia_Howard.pdf [file NIHMS681939-supplement-Electronic_Copyright_Form_for_Virginia_Howard.pdf]

## AHA License Agreement—Non-Commercial and No Modifications or Adaptations

**Creative Commons Attribution Non-Commercial-NoDerivs License (CC-BY-NC-ND).** This license only allows others to download your works and share them with others as long as they credit you, but they cannot change them in any way or use them commercially.

---

**Contribution  
number**

STROKE/2015/009128R1 **Author** *Virginia Howard*

---

Thank you for submitting your manuscript (the "Contribution") for publication in *Stroke*, an American Heart Association journal (the "Journal") published by Wolters Kluwer Health, Inc., operating as Medical Research/Lippincott Williams & Wilkins, a Delaware corporation, having its principal place of business at Two Commerce Square, 2001 Market Street, Philadelphia, PA 19103 USA ("Wolters Kluwer"). In order to expedite the editing and publishing process and enable the American Heart Association, Inc. (The American Heart Association, Inc. [a New York not-for-profit corporation, located at 7272 Greenville Avenue, Dallas, Texas 75231]) and Wolters Kluwer to disseminate your Contribution to the fullest extent, this License Agreement must be executed. If the Contribution is not accepted for publication, or if the Contribution is subsequently rejected, this Agreement shall be null and void. **Publication cannot proceed without execution of this Agreement.**

### A. TERMS OF USE

1. The Contribution will be made Open Access under the terms of the Creative Commons Attribution Non-Commercial-NoDerivs License (<http://creativecommons.org/licenses/by-nc-nd/3.0/>) which permits use, distribution, and reproduction in any medium, provided that the Contribution is properly cited, the use is non-commercial and no modifications or adaptations are made.
2. For an understanding of what is meant by the terms of the Creative Commons License, please refer to Wolters Kluwer's Open Access information (<http://journals.lww.com/Pages/Open-Access.aspx/>) or to AHA's Copyright, Licensing, and Open Access guide to frequently asked questions (<http://www.ahajournals.org/site/openaccess>).
3. The author may make use of the submitted and peer reviewed versions of the Contribution prior to publication, provided that such use is not for commercial purposes and the final Contribution is cited appropriately as set forth in paragraph E below. Nothing herein shall permit dual publication in violation of journal ethical practices.

### B. RETAINED RIGHTS

The author or, if applicable, the author's employer, retains all proprietary rights in addition to copyright, such as patent rights in any process, procedure or article of manufacture described in the Contribution.

### C. PERMISSION TO PUBLISH

In order to facilitate dissemination of the Contribution in accordance with paragraph A above, the author grants to the American Heart Association, Inc., and Wolters Kluwer, during the full term of the authors copyright and any extensions or renewals, a non-exclusive license of all rights of copyright in and to the Contribution, and all rights therein, including but not limited to the right to publish, republish, transmit, sell, distribute, and otherwise use the Contribution in whole or in part in electronic and/or print editions of *Stroke* and in derivative works throughout the world, in all languages and in

all media of expression now known or later developed, and to license or permit others to do so. Commercial usage rights are managed by Wolters Kluwer on behalf of the American Heart Association, Inc.

#### **D. CONTRIBUTIONS OWNED BY EMPLOYER**

If the Contribution was written by the author in the course of the author's employment (as a "work-made-for-hire" in the course of employment), the Contribution is owned by the company/employer which must sign their own copy of this Agreement (in addition to the author's copy). In such case, the company/employer hereby grants to the American Heart Association, Inc., and Wolters Kluwer, during the full term of copyright, a non-exclusive license of all rights of copyright in and to the Contribution for the full term of copyright throughout the world as specified in paragraph C above.

#### **E. COPYRIGHT NOTICE**

The copyright in each Contribution published in *Stroke* shall be in the name of the author(s) or other owner of copyright as appropriate. The author and the company/employer agree that any and all copies of the Contribution or any part thereof distributed or posted by them in print or electronic format as permitted herein will include a full citation to the Journal as follows: Journal copyright © The American Heart Association, Inc., published on behalf of the American Heart Association, Inc., by Wolters Kluwer Health, Inc. Note: Compilation and layout are copyrighted the American Heart Association, Inc.

#### **F. AUTHORSHIP RESPONSIBILITY, CRITERIA, AND CONTRIBUTIONS**

Each author should meet all criteria below (1, 2, and 3) and should indicate general and specific contributions by reading the criteria and checking the appropriate lines.

1. By checking this box, I certify these **three** things:

- The Contribution represents valid work and neither it nor another one that that I have written with substantially similar content has been published or is being considered for publication elsewhere, except as described in an attachment.
- If asked, I will provide or fully cooperate in obtaining and providing the data on which the Contribution is based so the editors or their assignees can examine it.
- For Contributions with more than 1 author, I agree to allow the corresponding author to
  - be the main correspondent with the editorial office,
  - review the edited Contribution and proof, and
  - make decisions about releasing Contribution information to the media, federal agencies, or both.

If I am the only author, I will be the corresponding author and agree to handle these responsibilities.

2. I have given final approval of the submitted Contribution.

Yes  No

3. I have, or a coauthor has, had sufficient access to the data to verify the Contribution's scientific integrity.

Yes  No

4. I have participated sufficiently in the Contribution to take public responsibility for

part of the content **OR**  the whole content.

5. To qualify for authorship, you must have made substantial contributions to the intellectual content of the Contribution. Please indicate your contribution(s) to this Contribution. Check all that apply:

- conceived and designed the research
- acquired the data
- analyzed and interpreted the data
- performed statistical analysis
- handled funding and supervision
- drafted the Contribution
- made critical revision of the Contribution for important intellectual content
- other

Other (please list):

## G. ACKNOWLEDGMENT SECTION

Authors should obtain written permission from all individuals who are listed in the Acknowledgments section of the Contribution, because readers may infer their endorsement of data and conclusions. The corresponding author must sign the following statement, certifying that (1) all persons who have made substantial contributions in the Contribution (e.g., data collection, analysis, or writing or editing assistance), but who do not fulfill authorship criteria, are named with their specific contributions in the Acknowledgments section of the Contribution; (2) all persons named in the Acknowledgments section have provided the corresponding author with written permission to be named in the Contribution; and (3) if an Acknowledgments section is not included, no other persons have made substantial contributions to this Contribution.

The corresponding author must check below, which serves as certification of the statements in the Acknowledgement Section.  I am the corresponding author and I certify that section G is true.  I am a contributing author.

## H. PUBLIC ACCESS POLICY FUNDING DISCLOSURE

Please disclose below if the author has received funding for research on which the Contribution is based from any of the following organizations:

- National Institutes of Health (NIH)
- Wellcome Trust
- Howard Hughes Medical Institute (HHMI)
- Other

Other (please list):

## I. THE AUTHOR, OR EACH AUTHOR, HEREBY REPRESENTS AND WARRANTS THAT:

- I am the sole author of the Contribution, or all authors have participated in and agree with the content and Contribution's conclusions,
- the Contribution is original and does not infringe upon any copyright, proprietary, or personal right of any third party, and
- no part of it nor any Contribution based on substantially similar data has been submitted to another journal for publication.
- If excerpts from copyrighted works owned by third parties are included, I have obtained written permission from the copyright owners for all uses as set forth in this Agreement and have shown credit to the sources in the Contribution.

**Please read carefully. Select the appropriate authorship category that applies to you, as an author, for this Contribution. Only 1 option may be selected.**

---

**Author-owned work.**

As the author of an author-owned work, I agree to the AHA LICENSE AGREEMENT as shown above.

Checking this box acts as your signature for this AHA License Agreement

---

**U.S. Government work.**

A Contribution prepared by a U.S. federal government employee as part of the employee's official duties, or which is an official U.S. Government publication, is called a "U.S. Government work," and is in the public domain in the United States. Author acknowledges that the Contribution will be published in the United States and other countries. If the Contribution was not prepared as part of the employee's duties or is not an official U.S. Government publication, it is not a U.S. Government work. As the author of a U.S. Government work, I agree to the AHA LICENSE AGREEMENT as shown above.

Checking this box acts as your signature for this AHA License Agreement

---

**U.K. Government work.**

The rights in a Contribution prepared by an employee of a U.K. government department, agency, or other Crown body as part of his/her official duties, or which is an official government publication, belong to the Crown. Authors must ensure they comply with departmental regulations and submit the appropriate authorization to publish. If your status as a government employee legally prevents you from signing this Agreement, please contact the *Stroke* editorial office ([stroke@strokeahajournal.org](mailto:stroke@strokeahajournal.org)). Otherwise, as the author of a U.K. Government work, I agree to the AHA LICENSE AGREEMENT as shown above.

Checking this box acts as your signature for this AHA License Agreement

---

**Other, Including Other Government work or Non-Governmental Organization work.**

Note to Non-U.S., Non-U.K. Government Employees or Non-Governmental Organization Employees: If your status as a government or non-governmental organization employee legally prevents you from signing this Agreement, please contact the *Stroke* editorial office ([stroke@strokeahajournal.org](mailto:stroke@strokeahajournal.org)). Otherwise, as the author of an "Other" work, I agree to the AHA LICENSE AGREEMENT as shown above.

Name of Government/Non-Governmental Organization:

Copyright line as it should appear with the Contribution:

Checking this box acts as your signature for this AHA License Agreement

---

**Company/Institution-owned Contribution (made-for-hire in the course of employment).**

As the author of a Company/Institution-owned work, I agree to the AHA LICENSE AGREEMENT as shown above. Note: An authorized signature of the Company/Institution is required. Please contact the *Stroke* editorial office ([stroke@strokeahajournal.org](mailto:stroke@strokeahajournal.org)) for assistance.

Name of Company/Institution:

Copyright line as it should appear with the Contribution:

Checking this box acts as your signature for this AHA License Agreement

---

Author's Name: Virginia Howard  
Date: March 16, 2015 15:55 GMT  
IP Address: 138.26.145.90

local\_p\_id: 70980  
time: 1426521387  
ip address: 138.26.145.90
